# Supplementary material for: Injection Site Reactions with Long-Term Pegcetacoplan Use in Patients with Paroxysmal Nocturnal Hemoglobinuria: A Brief Report
Source: Springer Nature journal article supplement (doi:10.1007/s12325-023-02653-4), 2023-09-14
Supplement: MOESM1 [file 26042526]

## **Supplemental Materials**

### **Injection Site Reactions with Long-term Pegcetacoplan Use in Patients with Paroxysmal Nocturnal Hemoglobinuria: A Brief Report**

**Authors:** Vivek Sharma, MD, FACP,<sup>1</sup> Jamie Koprivnikar, MD,<sup>2</sup> Kristen Drago, RN,<sup>3</sup> Jessica Savage, MD,<sup>3</sup> Allison Bachelor, MSN, RN<sup>3</sup>

**Affiliations:** <sup>1</sup>University of Louisville, Louisville, KY, USA; <sup>2</sup>John Theurer Cancer Center at Hackensack University Medical Center, Hackensack, NJ, USA; <sup>3</sup>Apellis Pharmaceuticals, Inc, Waltham, MA, USA

**Corresponding author:** Vivek Sharma

**Address:**

University of Louisville Health - Brown Cancer Center

529 South Jackson Street

Louisville, KY 40202

**Email:** vivek.sharma@louisville.edu

**Table S1.** List of IRBs and/or IECs

| <b>Central IRBs/IECs</b>                                                                                                                                                          | <b>Site number(s)</b> |
|-----------------------------------------------------------------------------------------------------------------------------------------------------------------------------------|-----------------------|
| <b>Advarra</b><br>6940 Columbia Gateway Drive<br>Suite 110<br>Columbia, MD 21046, USA                                                                                             | 01016                 |
|                                                                                                                                                                                   | 01021                 |
|                                                                                                                                                                                   | 01003                 |
|                                                                                                                                                                                   | 01001                 |
|                                                                                                                                                                                   | 01025                 |
|                                                                                                                                                                                   | 01026                 |
|                                                                                                                                                                                   | 01002                 |
|                                                                                                                                                                                   | 01011                 |
| <b>South West and Overseas Persons Protection Committee IV- CPPSOOM4</b><br>Cabanis Haut<br>ESQUIROL Hospital Center<br>15 rue du Docteur Marcland<br>Limoges cedex 87025, France | 06005                 |
|                                                                                                                                                                                   | 06008                 |
|                                                                                                                                                                                   | 06007                 |
|                                                                                                                                                                                   | 06006                 |
|                                                                                                                                                                                   | 06001                 |
|                                                                                                                                                                                   | 06009                 |
|                                                                                                                                                                                   | 06003                 |
|                                                                                                                                                                                   | 06010                 |
| <b>Ethnics Committee of the University of Duisburg-Essen</b><br>Robert-Koch-Str. 9-11<br>Essen 45147, Germany                                                                     | 05001                 |
|                                                                                                                                                                                   |                       |
| <b>University and Polytechnic Hospital Faith Medicines Research Ethics Committee</b>                                                                                              | 09002                 |

|                                                                                                                                                    |       |
|----------------------------------------------------------------------------------------------------------------------------------------------------|-------|
| Avenida Fernando Abril<br>Martorell, nº 106, Torre A<br>planta 7ª 4<br>Valencia 6026, Spain                                                        | 09001 |
| <b>Western IRB</b><br>1019 South East 39 <sup>th</sup> Avenue<br>Suite 120<br>Puyallup, WA 98374, USA                                              | 01019 |
| <b>Delta General Hospital Medical Ethics Committee</b><br>Oude Leielaan 6<br>Menen 8930, Belgium                                                   | 07001 |
| <b>Saint-Luc University Hospital-Faculty Ethics Committee</b><br>Promenade de l'Alma 51 bte<br>1.43.03<br>Bruxelles 1200, Belgium                  | 07002 |
| <b>Duke Health IRB</b><br>2424 Erwin Road<br>Suite 405<br>Durham, NC 27705, USA                                                                    | 01009 |
| <b>Ethics Committee of Pavlov First Saint Petersburg State Medical University</b><br>L'va Tolstogo Street, 6/8<br>Saint Petersburg, 197022, Russia | 11006 |

|                                                                                                                                                                |       |
|----------------------------------------------------------------------------------------------------------------------------------------------------------------|-------|
| <b>Ethics Committee at the Medical University of RWTH Aachen University</b><br>Universitätsklinikum Aachen<br>Pauwelsstraße 30<br>52074 Aachen, Germany        | 05002 |
| <b>Ethics Committee of the Hamburg Medical Association</b><br>Weidestraße 122b<br>22083 Hamburg, Germany                                                       | 05004 |
| <b>Ethics Committee of the University of Ulm</b><br>Helmholtzstraße 20<br>89081 Ulm, Germany                                                                   | 05003 |
| <b>Health Research Ethics Board University of Alberta</b><br>308 Campus Towers<br>Edmonton, Alberta T6G 1K8, Canada                                            | 10001 |
| <b>IRB of Chungnam National University Hospital</b><br>2F, Research Center for Biomedical Convergence<br>Munwha-ro 282, Jung-gu<br>Daejeon, 35015, South Korea | 13002 |
| <b>IRB of Medical Corporation Ohryokukai, Nihonbashi Sakura Clinic</b><br>Inamura Building 5F, 1-9-2, Nihonbashi Kayaba-cho<br>Chuo-ku, Tokyo 103-0025, Japan  | 03006 |
| <b>IRB of Japanese Red Cross Nagoya Daiichi Hospital</b><br>3-35 Michishita-cho, Nakamura-ku                                                                   | 03008 |

|                                                                                                                                                      |       |
|------------------------------------------------------------------------------------------------------------------------------------------------------|-------|
| Nagoya, Aichi, 453-8511, Japan                                                                                                                       |       |
| <b>IRB of Japanese Red Cross Nagoya Daini Hospital</b><br>2-9 Myoken-cho, Showa-ku<br>Nagoya, Aichi, 466-8650, Japan                                 | 03009 |
| <b>IRB of Juntendo University Hospital</b><br>3-1-3 Hongo<br>Bunkyo-ku, Tokyo 113-8431, Japan                                                        | 03003 |
| <b>IRB of Okayama University Hospital</b><br>2-5-1 Shikata-cho, Kita-ku<br>Okayama-city, Okayama, 700-8558, Japan                                    | 03010 |
| <b>IRB of Shinshu University Hospital</b><br>3-1-1 Asahi, Matsumoto<br>Nagano, 390-8621, Japan                                                       | 03007 |
| <b>Melbourne Health Human Research Ethics Committee</b><br>The Royal Melbourne Hospital<br>300 Grattan Street<br>Parkville, Victoria 3050, Australia | 02001 |
| <b>Northwestern University IRB</b><br>750 North Lake Shore Drive<br>7 <sup>th</sup> Floor<br>Chicago, IL 60611, USA                                  | 01012 |

|                                                                                                                                                                                                                                                           |       |
|-----------------------------------------------------------------------------------------------------------------------------------------------------------------------------------------------------------------------------------------------------------|-------|
| <p><b>NTT Medical Center Tokyo IRB</b><br/> 5-9-22 Higashi-Gotanda<br/> Shinagawa-ku, Tokyo 141-8625, Japan</p>                                                                                                                                           | 03001 |
| <p><b>Pharmnadzor, LLC</b><br/> Komendantsky prospect 4 liter A<br/> Office 618<br/> Saint Petersburg, 197227, Russia</p>                                                                                                                                 | 11005 |
| <p><b>Research Ethics Committee Yorkshire and the Humber–Leeds East Health Research Authority</b><br/> National Health Service Blood and Transplant Newcastle Blood Donor Center<br/> Holland Drive<br/> Newcastle upon Tyne, NE2 4NQ, United Kingdom</p> | 04001 |
| <p><b>Roswell Park IRB</b><br/> Roswell Park Cancer Institute<br/> 665 Elm Street<br/> Buffalo, New York 14263, USA</p>                                                                                                                                   | 01013 |
| <p><b>Samaritan Health Services Regional IRB</b><br/> Samaritan Health Services Research Institute<br/> 2300 North West Walnut Boulevard<br/> Corvallis, OR 97330, USA</p>                                                                                | 01014 |
| <p><b>University Health Network Research Ethics Board</b><br/> 700 University Avenue<br/> 10<sup>th</sup> Floor, Room 1056</p>                                                                                                                            | 10002 |

|                                                                                                                 |       |
|-----------------------------------------------------------------------------------------------------------------|-------|
| Toronto, Ontario, M5G 1Z5, Canada                                                                               |       |
| <b>University of Southern California IRB</b><br>1640 Marengo Street<br>Suite 700<br>Los Angeles, CA, 90033, USA | 01010 |

*IEC* institutional ethics committee, *IRB* institutional review board.

**Table S2.** MedDRA SOC and PTs classified as plain language terms

| SOC                                                  | PT                                | Plain language term <sup>17,18</sup>                                                                    |
|------------------------------------------------------|-----------------------------------|---------------------------------------------------------------------------------------------------------|
| General disorders and administration site conditions | Administration site discoloration | Change in color, not the color it normally is, and/or odd color                                         |
|                                                      | Administration site swelling      | Abnormal enlargement                                                                                    |
|                                                      | Infusion site bruising            | Injury involving rupture of small blood vessels and discoloration without a break in the overlying skin |
|                                                      | Infusion site erythema            | Redness                                                                                                 |
|                                                      | Infusion site induration          | Thickening or hardening                                                                                 |
|                                                      | Infusion site reaction            | Response at the injection site                                                                          |
|                                                      | Infusion site swelling            | Abnormal enlargement                                                                                    |
|                                                      | Infusion site urticaria           | Hives, itch, and/or rash on the skin                                                                    |
|                                                      | Injection site bruising           | Injury involving rupture of small blood vessels and discoloration without a break in the overlying skin |
|                                                      | Injection site discoloration      | Change in color, not the color it normally is, and/or odd color                                         |
|                                                      | Injection site erythema           | Redness                                                                                                 |
|                                                      | Injection site hematoma           | Pooling of blood due to a larger blood vessel leakage                                                   |
|                                                      | Injection site hemorrhage         | Bleeding                                                                                                |
|                                                      | Injection site induration         | Thickening or hardening                                                                                 |



|                                                 |                           |                                                   |
|-------------------------------------------------|---------------------------|---------------------------------------------------|
|                                                 | Injection site mass       | Palpable, firm, discrete, or well-demarcated lump |
|                                                 | Injection site pain       | Physical suffering or discomfort                  |
|                                                 | Injection site pruritus   | Itchy skin                                        |
|                                                 | Injection site rash       | Red itchy swelling on skin                        |
|                                                 | ISR                       | Response at the injection site                    |
|                                                 | Injection site swelling   | Abnormal enlargement                              |
|                                                 | Vaccination site erythema | Redness                                           |
|                                                 | Vaccination site pain     | Physical suffering or discomfort                  |
|                                                 | Vaccination site swelling | Abnormal enlargement                              |
| Injury, poisoning, and procedural complications | Infusion-related reaction | Response at the infusion site                     |
| Skin lesion and subcutaneous tissue disorders   | Skin lesion               | Cut, injury, wound, and/or sore on the skin       |

*ISR* injection site reaction, *MedDRA* Medical Dictionary for Regulatory Activities, *PT* Preferred Term, *SOC* System Organ Class.
